# Supplementary material
Source: publisher figshare collection journal article supplement (https://tandf.figshare.com/ndownloader/files/22253877)

## SUPPLEMENTARY MATERIAL

**Supplementary Figure 1:** Growth curve of the cell lines HL60 and RAJI treated with different concentrations of azacitidine.

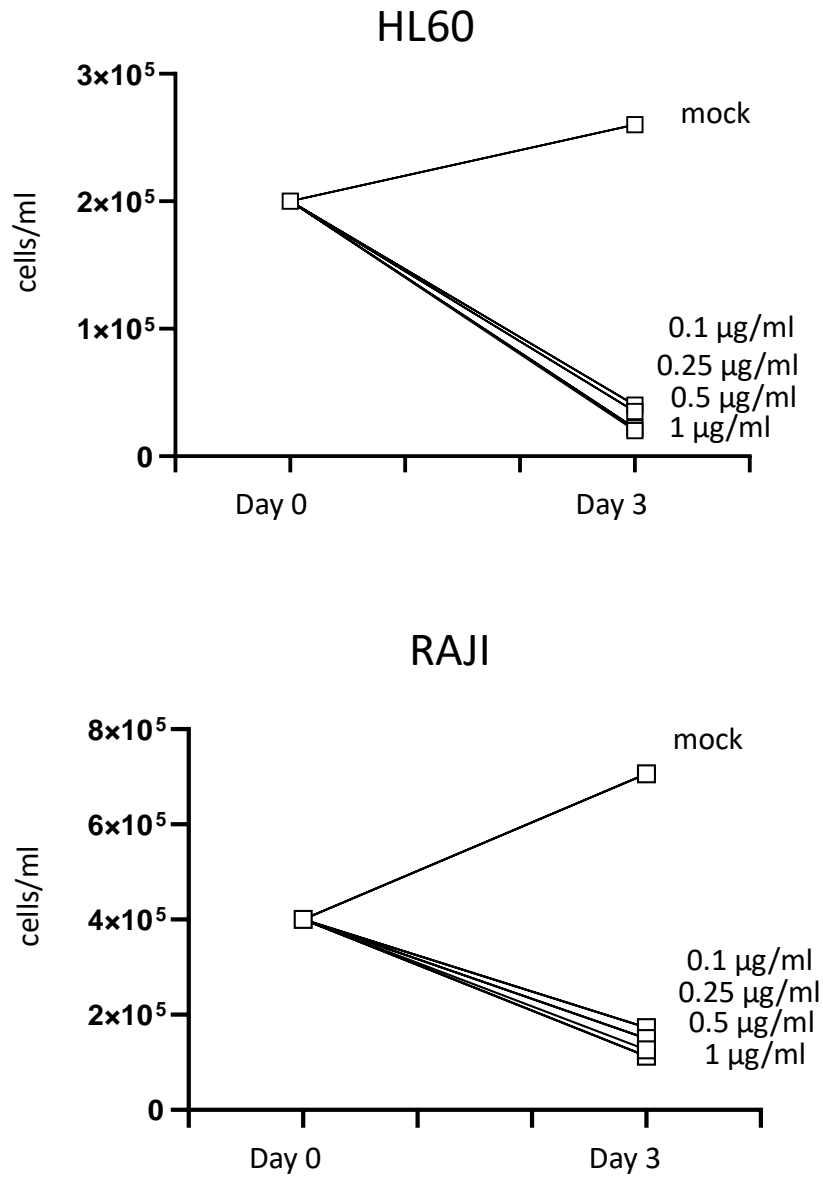

**Supplementary Figure 2:** Methylation-specific PCR for the DAP-k gene promoter in the RAJI cell line treated with increasing concentrations of azacitidine (U: unmethylated; M: methylated).

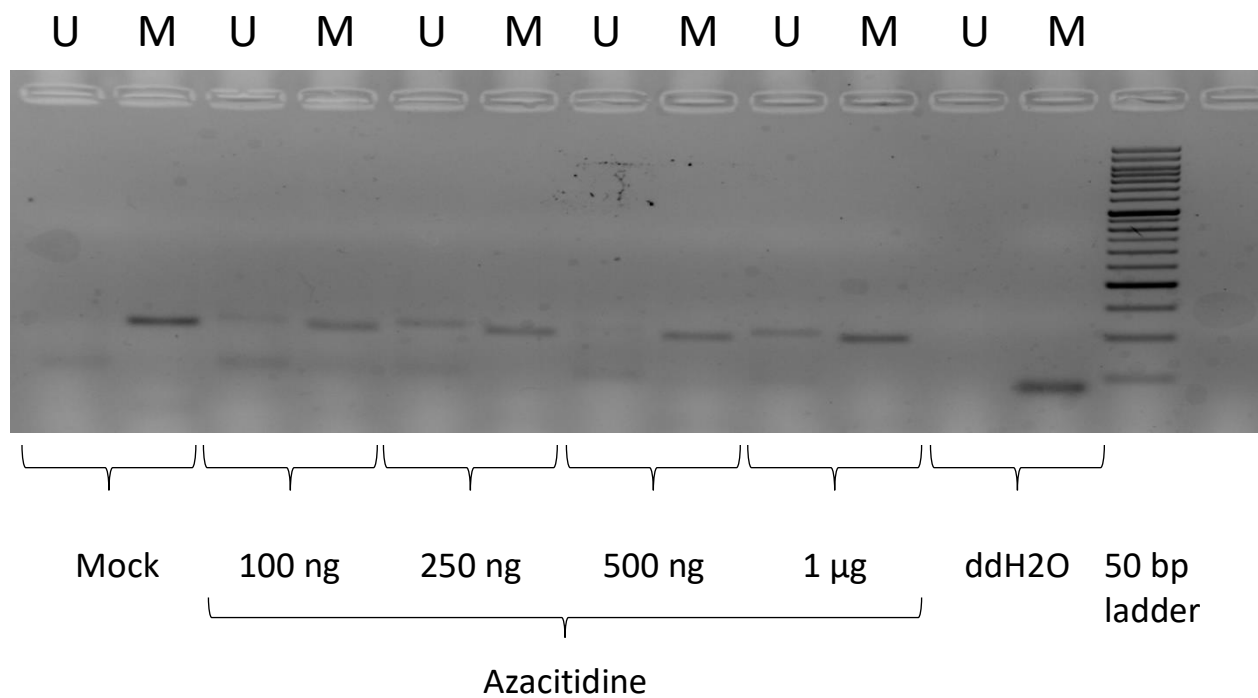

Supplement: Supplementary file 1 [file 22253877]
